# Supplementary material
Source: MDPI journal article supplement (https://www.mdpi.com/2073-4433/13/10/1643)
Supplement: s1 [file s1]

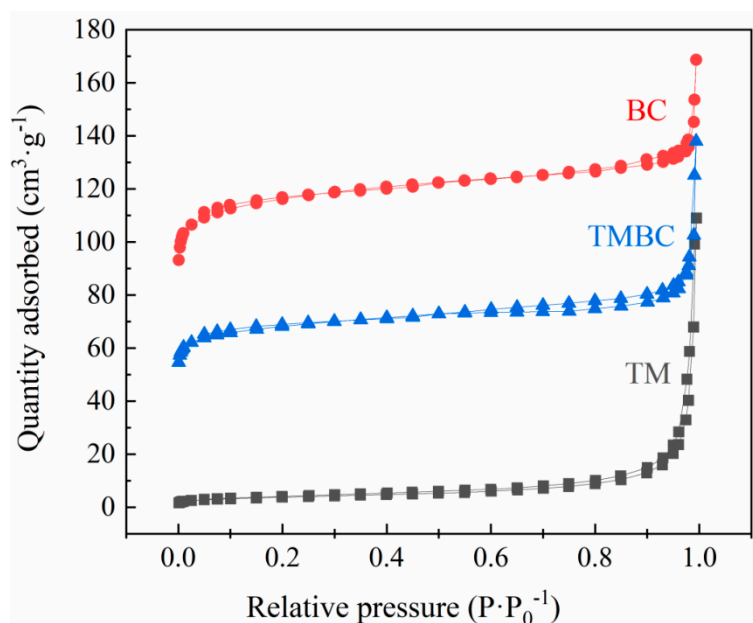

**Figure S1.** The N<sub>2</sub> adsorption-desorption isotherms of TM, BC and TMBC.

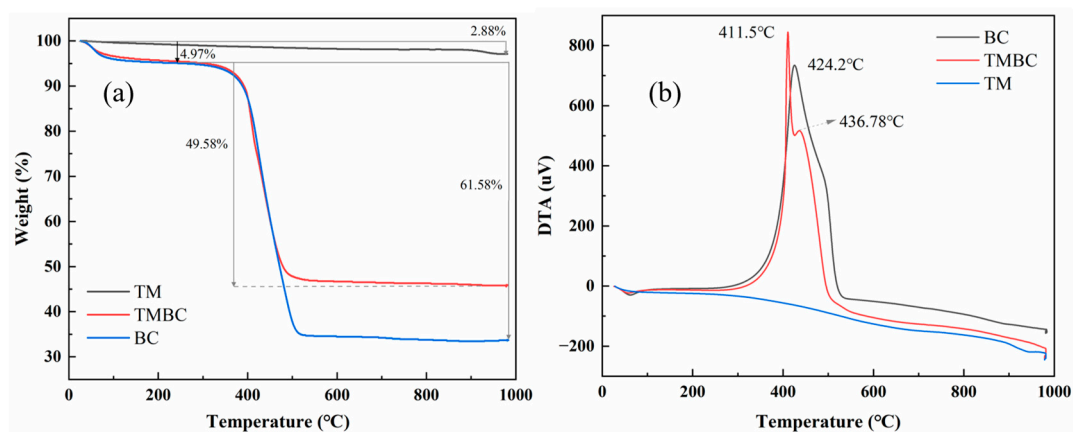

**Figure S2.** TGA/DTA curves of TM, BC and TMBC.

**Table S1.** The surface area and pore volume of TM, BC and TMBC.

| Samples | BET-N <sub>2</sub> surface area<br>(m <sup>2</sup> ·g <sup>-1</sup> ) | Total pore volume<br>(cm <sup>3</sup> ·g <sup>-1</sup> ) | Average pore diameter (nm) |
|---------|-----------------------------------------------------------------------|----------------------------------------------------------|----------------------------|
| TM      | 13.176                                                                | 0.167                                                    | 48.952                     |
| BC      | 453.587                                                               | 0.081                                                    | 34.060                     |
| TMBC    | 265.071                                                               | 0.112                                                    | 30.542                     |
